# Supplementary material for: Charge-transfer salts based on Lindqvist and Keggin polyoxoanion acceptors and ferrocenyl cationic donors
Source: Royal Society of Chemistry journal article supplement (doi:10.1039/c2nj20911j), 2012-01-01
Supplement: c2nj20911j.pdf [file c2nj20911j.pdf]

## Supporting Information

### Charge-transfer salts based on Lindqvist and Keggin polyoxoanion acceptors and ferrocenyl cationic donors

Jun Xiong, Yujuan Niu, Haisheng Xu, Guolei Cao, Bin Liu, Huaiming Hu and Ganglin Xue\*

Key Laboratory of Synthetic and Natural Functional Molecule Chemistry (Ministry of Education), Department of Chemistry, Northwest University, Xi'an, 710069, China.

The diffuse reflectance spectra for compounds **3**, **4** and corresponding starting materials were performed on Shimadzu UV-2550.

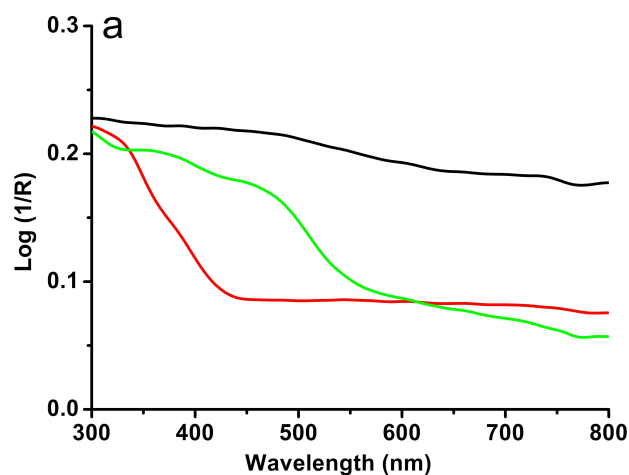

**Figure S1a.** Diffuse reflectance spectra of **3** (black line) dispersed in barium sulfate in comparison with the diffuse reflectance spectra of starting materials, [NBu<sub>4</sub>]<sub>2</sub>[W<sub>6</sub>O<sub>19</sub>] (red line) and CpFeCpCH<sub>2</sub>P(Ph)<sub>3</sub>I (green line), respectively.

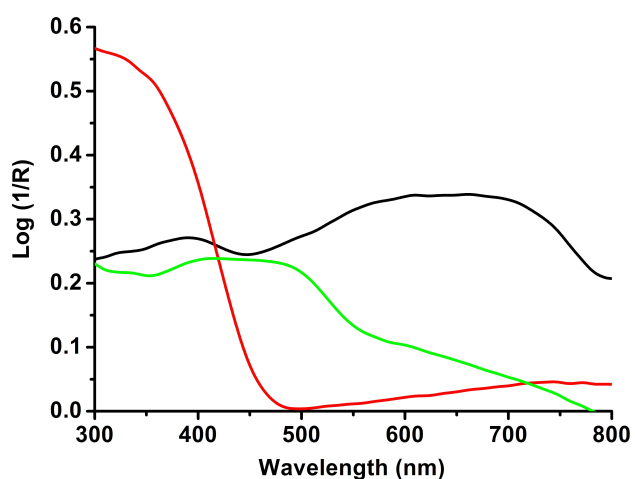

**Figure S1b.** Diffuse reflectance spectra of **4** (black line) dispersed in barium sulfate in comparison with the diffuse reflectance spectra of starting materials,  $[\text{NBu}_4]_3[\text{PMo}_{12}\text{O}_{40}]$  (red line) and  $\text{CpFeCpCH}_2\text{N}(\text{CH}_3)_2\text{C}_2\text{H}_5\text{Br}$  (green line), respectively.

The negative ESI-MS spectra of 0.01 mM acetonitrile solution of **1-4** were performed on MicroTOF-Q II mass spectrometer.

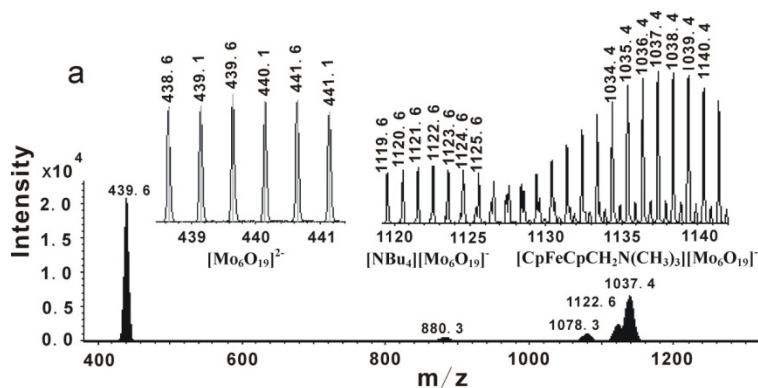

**Figure S2a.** The negative ESI-MS spectra of 0.01 mM acetonitrile solution of **1**.

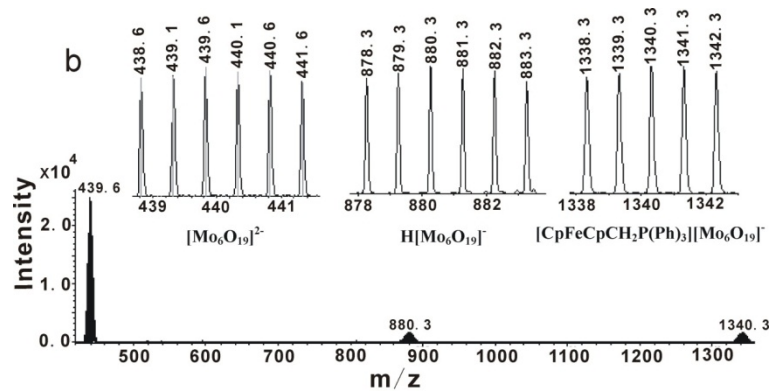

Figure S2b. The negative ESI-MS spectra of 0.01 mM acetonitrile solution of 2.

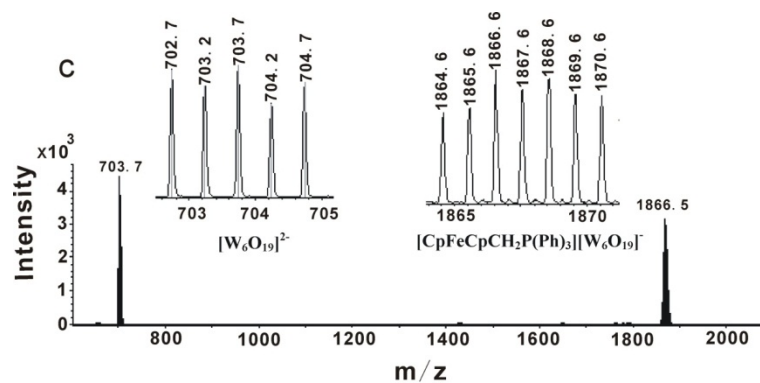

Figure S2c. The negative ESI-MS spectra of 0.01 mM acetonitrile solution of 3.

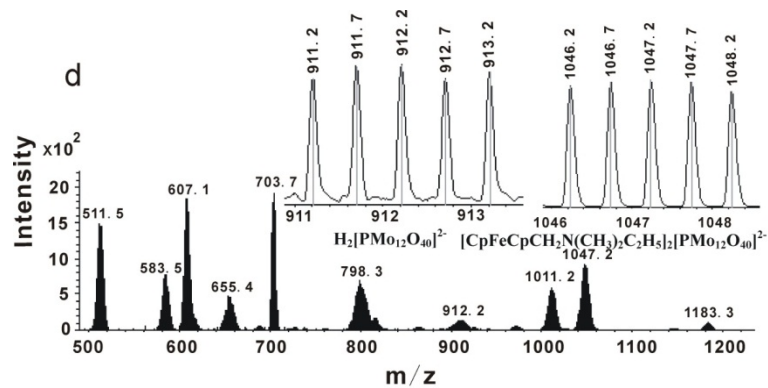

Figure S2d. The negative ESI-MS spectra of 0.01 mM acetonitrile solution of 4.
